# Supplementary material for: The Risk of Abdominal Obesity according to the Degree of Non-Alcoholic Fatty Liver Disease in Korean Men
Source: PubMed Central journal article supplement — J Korean Med Sci. 2016 Feb 25;31(3):410–6. doi: 10.3346/jkms.2016.31.3.410 (PMC4779866; doi:10.3346/jkms.2016.31.3.410), 2016-02-25
Supplement: jkms-31-410-s001.pdf [file jkms-31-410-s001.pdf]

**Supplementary Table 1.** Hazard ratios and 95% confidence intervals for the incidence of abdominal obesity according to categories of non-alcoholic fatty liver diseases in people with age < 45 yr (n = 6,158)

|                    | Hazard ratios (95% confidence interval) |                  |                  |                  |
|--------------------|-----------------------------------------|------------------|------------------|------------------|
|                    | Unadjusted                              | Age-adjusted     | Model 1          | Model 2          |
| NAFLD              |                                         |                  |                  |                  |
| Normal             | 1.00 (reference)                        | 1.00 (reference) | 1.00 (reference) | 1.00 (reference) |
| Mild               | 2.23 (1.94-2.56)                        | 2.22 (1.94-2.55) | 0.99 (0.82-1.19) | 1.05 (0.86-1.27) |
| Moderate to severe | 3.63 (2.46-5.35)                        | 3.63 (2.46-5.35) | 1.16 (0.70-1.91) | 1.28 (0.77-2.11) |
| <i>P</i> for trend | < 0.001                                 | < 0.001          | 0.087            | 0.035            |
| Age                | -                                       | 1.01 (0.99-1.03) | 0.98 (0.96-1.01) | 0.98 (0.96-1.01) |
| Baseline WC        | -                                       | -                | 1.30 (1.27-1.34) | 1.31 (1.27-1.34) |
| Total cholesterol  | -                                       | -                | 1.00 (1.00-1.01) | 1.00 (1.00-1.01) |
| Log(hsCRP)         | -                                       | -                | 1.04 (0.95-1.13) | 1.03 (0.94-1.12) |
| HOMA-IR            | -                                       | -                | 1.02 (0.93-1.13) | 1.05 (0.94-1.16) |
| eGFR               | -                                       | -                | 0.99 (0.98-1.00) | 0.99 (0.98-1.00) |
| Smoking status     | -                                       | -                | -                | 1.05 (0.88-1.26) |
| Regular exercise   | -                                       | -                | -                | 0.57 (0.45-0.72) |
| Hypertension       | -                                       | -                | -                | 1.09 (0.85-1.40) |
| Diabetes mellitus  | -                                       | -                | -                | 1.83 (0.88-3.78) |

Model 1 was adjusted for age, baseline WC, total cholesterol, log(hsCRP), HOMA-IR and eGFR. Model 2 was adjusted for model 1 plus recent smoking status, regular exercise, hypertension and diabetes mellitus. NAFLD, non alcoholic fatty liver disease; WC, waist circumference; hsCRP, high-sensitivity C-reactive protein; HOMA-IR, homeostasis model assessment of insulin resistance; eGFR, estimated glomerular filtration rate.
